# Supplementary material for: ADSCs stimulated by resistin promote breast cancer cell malignancy via CXCL5 in a breast cancer coculture model
Source: PubMed Central journal article supplement (PMC9475041; doi:10.1038/s41598-022-19290-6), 2022-09-14

# Supplementary materials – Original blot images

**Figure 2E:**

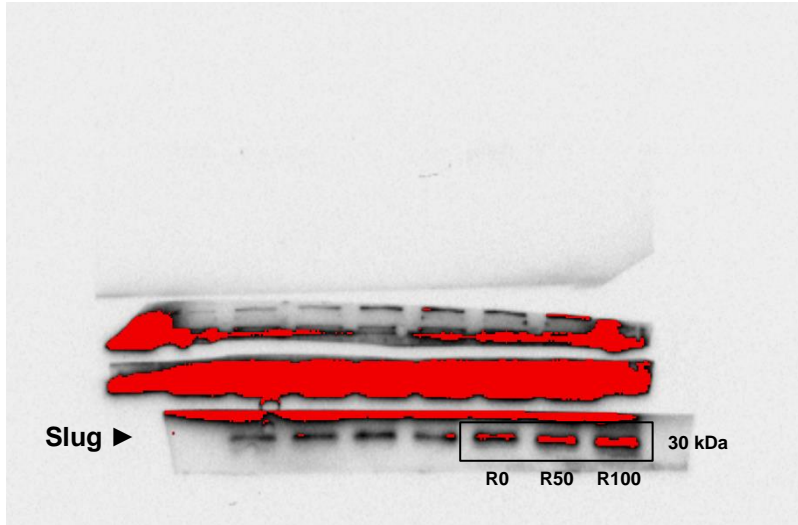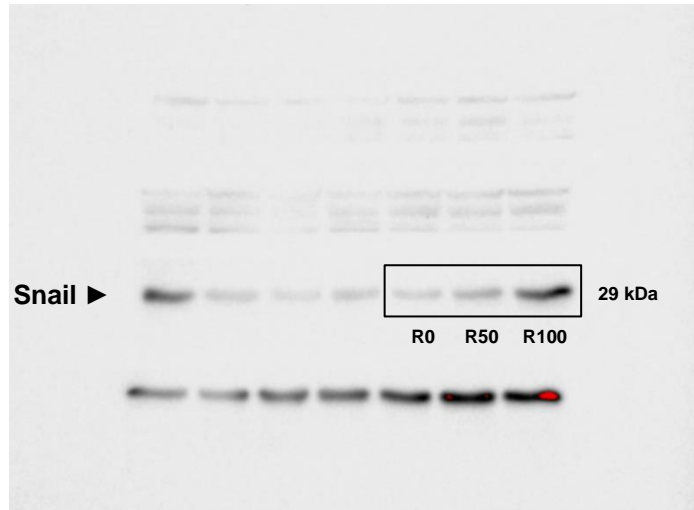

**Figure 2E (continued):**

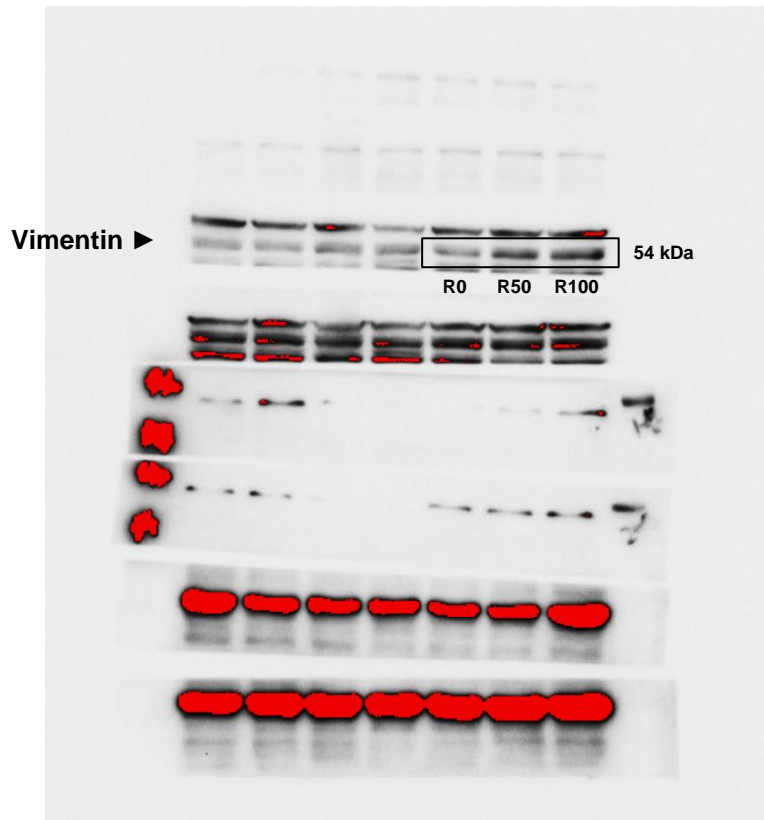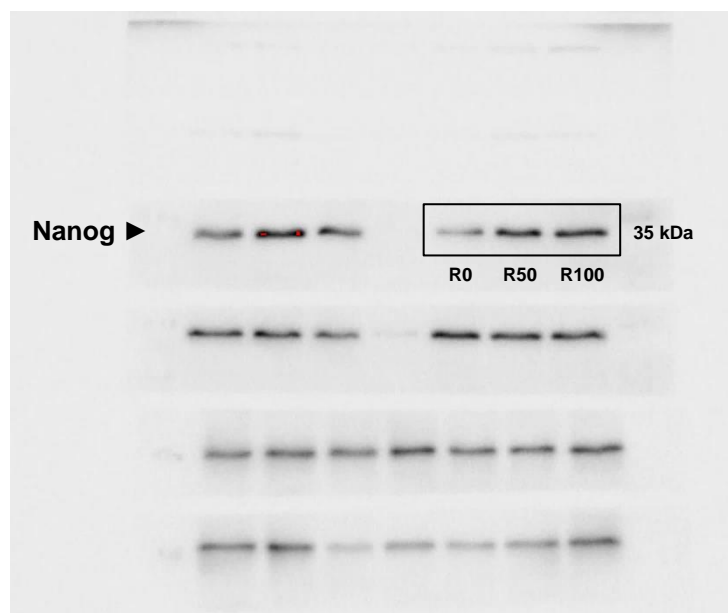

**Figure 2E (continued):**

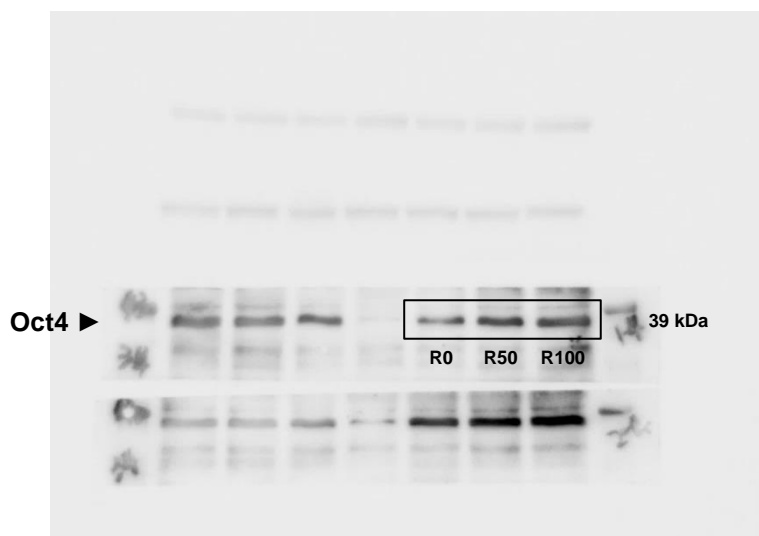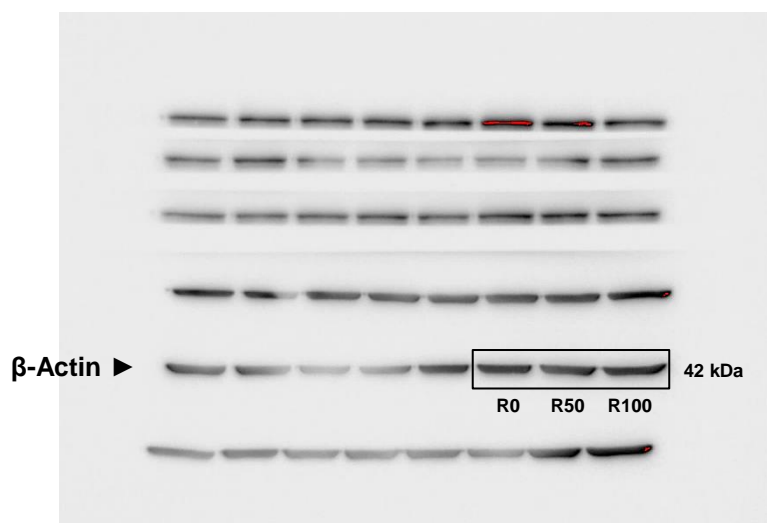

**Figure 3A:**

**R0**

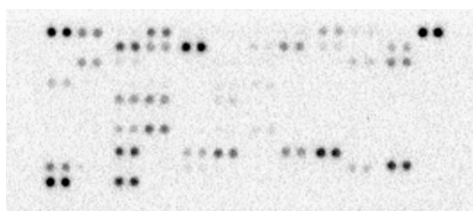

**R100**

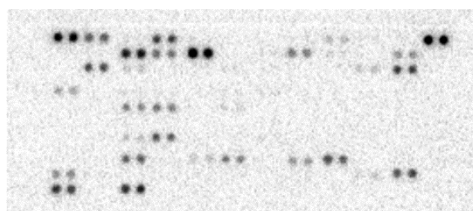

**Figure 3E:**

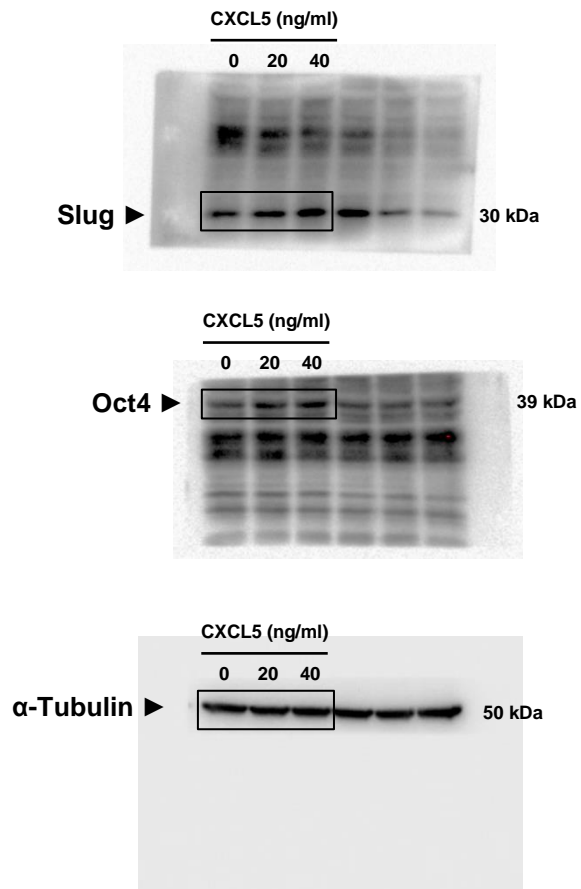

**Figure 4A:**

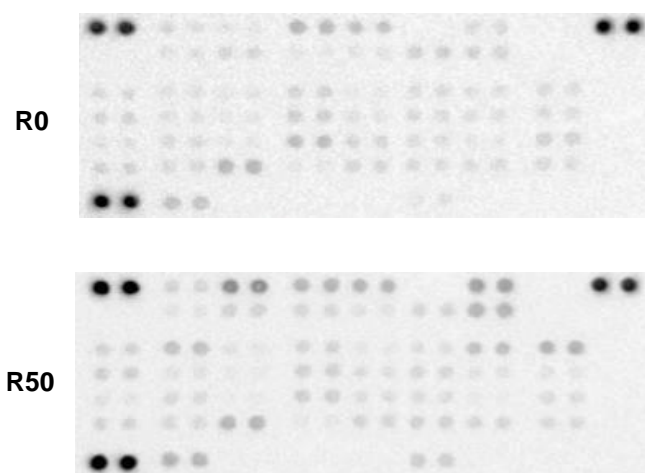

**Figure 4B:**

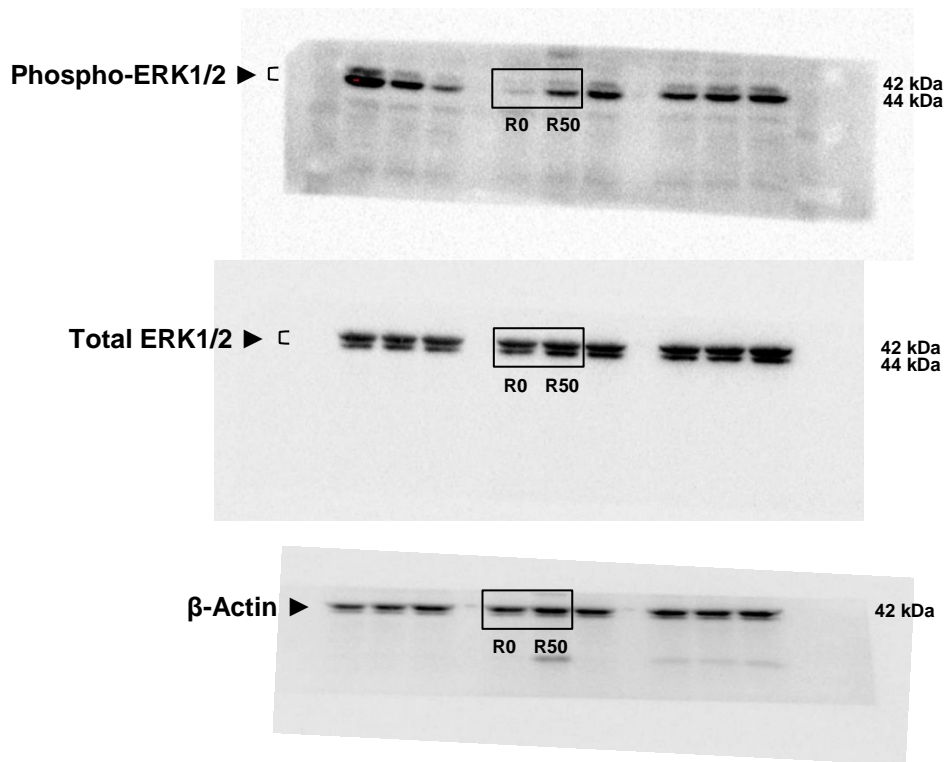

Supplement: 41598_2022_19290_MOESM2_ESM.pdf [file 41598_2022_19290_MOESM2_ESM.pdf]
