# Supplementary material for: ADSCs stimulated by resistin promote breast cancer cell malignancy via CXCL5 in a breast cancer coculture model
Source: PubMed Central journal article supplement (PMC9475041; doi:10.1038/s41598-022-19290-6), 2022-09-14
Supplement: 41598_2022_19290_MOESM3_ESM.pdf [file 41598_2022_19290_MOESM3_ESM.pdf]

**Supplementary Table S1.** Clinical characteristics of patient donors for the establishment of adipose-derived stem cell (ADSC) cultures.

| Patient donor | #1   | #2   | #3 | #4  | #5  | #6  | #7 | #8   | #9  | #10 |
|---------------|------|------|----|-----|-----|-----|----|------|-----|-----|
| Age (y)       | 65   | 68   | 51 | 78  | 42  | 71  | 70 | 68   | 49  | 62  |
| Stage         | IIIA | IIIA | 0  | nd  | IIB | IV  | IA | IIIB | IV  | IA  |
| Grade         | 3    | 2    | 3  | 2   | 2   | 3   | 2  | 3    | 2   | 3   |
| Primary tumor | T2   | T2   | T1 | T2  | T3  | T1  | T2 | T3   | T2  | T2  |
| LN metastasis | yes  | yes  | no | yes | no  | yes | no | yes  | yes | no  |
| ER status     | -    | +    | -  | +   | +   | +   | +  | +    | +   | +   |
| PR status     | -    | -    | -  | -   | +   | +   | +  | +    | +   | +   |
| HER2 status   | -    | +    | +  | +   | +   | +   | -  | +    | +   | -   |

The pathologies were classified according to the Cancer Staging Manual of American Joint Committee on Cancer (AJCC; American College of Surgeons, Chicago, IL, USA).

+, positive; -, negative; ER, estrogen receptor; HER2, epidermal growth factor receptor 2; LN, lymph node; nd, not determined; PR, progesterone receptor; T1, tumor size  $\leq 2$  cm; T2, tumor size  $> 2$  cm but  $\leq 5$  cm; T3, tumor size  $> 5$  cm.
